# Supplementary material for: A benzaldehyde–indole fused chromophore-based fluorescent probe for double-response to cyanide and hypochlorite in living cells
Source: Royal Society of Chemistry journal article supplement (doi:10.1039/d1an01015h), 2021-01-01
Supplement: d1an01015h1.pdf [file d1an01015h1.pdf]

## Supporting information

# **A benzaldehyde-indole fused chromophore-based fluorescent probe for double-response to cyanide and hypochlorite in living cells**

Kexin Zhang<sup>a, b, 1</sup>, Hao Wang<sup>b, 1</sup>, Siyao Cheng<sup>b</sup>, Cheng Zhang<sup>b</sup>, Xinrang

Zhai<sup>b</sup>, Xiangpeng Lin<sup>b</sup>, Hao Chen<sup>b</sup>, Ruru Gao<sup>b,\*</sup>, Wei Dong<sup>a, b,\*</sup>

<sup>a</sup> Molecular Metabolism Center, Nanjing University of Science and Technology,  
Nanjing, 210094, China

<sup>b</sup> School of Chemical Engineering, Nanjing University of Science and Technology,  
Nanjing, 210094, China

---

\* Corresponding author. E-mail address: [weidong@njust.edu.cn](mailto:weidong@njust.edu.cn) (W, Dong); [gaorr@njust.edu.cn](mailto:gaorr@njust.edu.cn) (R, Gao)

<sup>1</sup> Kexin Zhang and Hao Wang contributed equally to this work

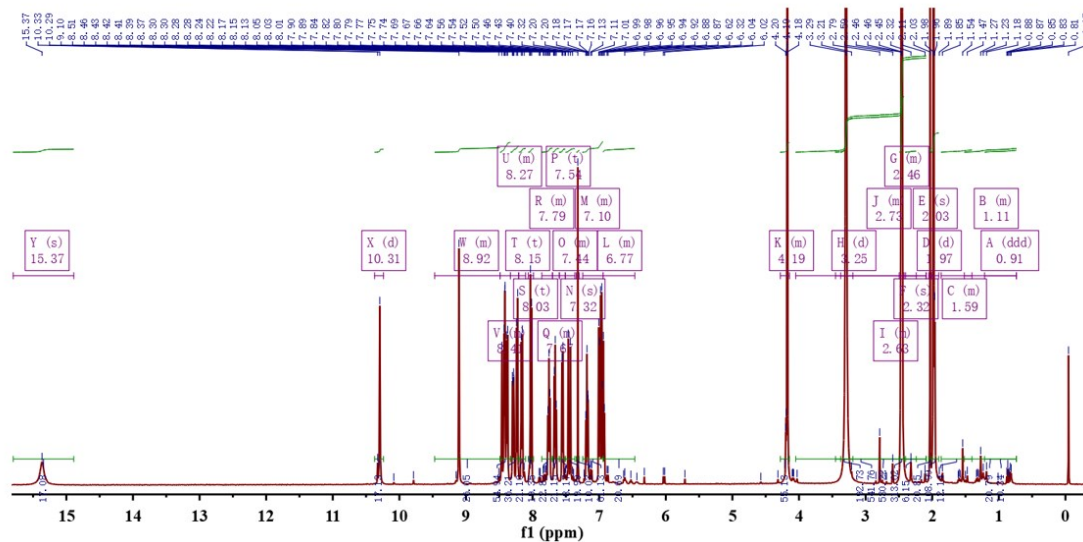

Fig. S1  $^1\text{H}$  NMR of HHTB in  $\text{DMSO-}d_6$ .

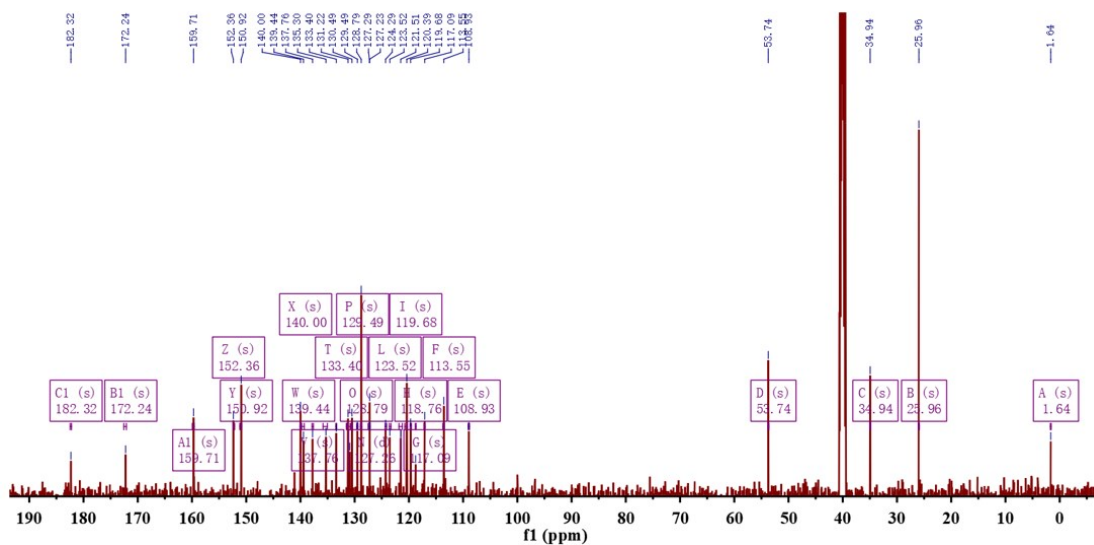

Fig. S2  $^{13}\text{C}$  NMR of HHTB in  $\text{DMSO-}d_6$ .

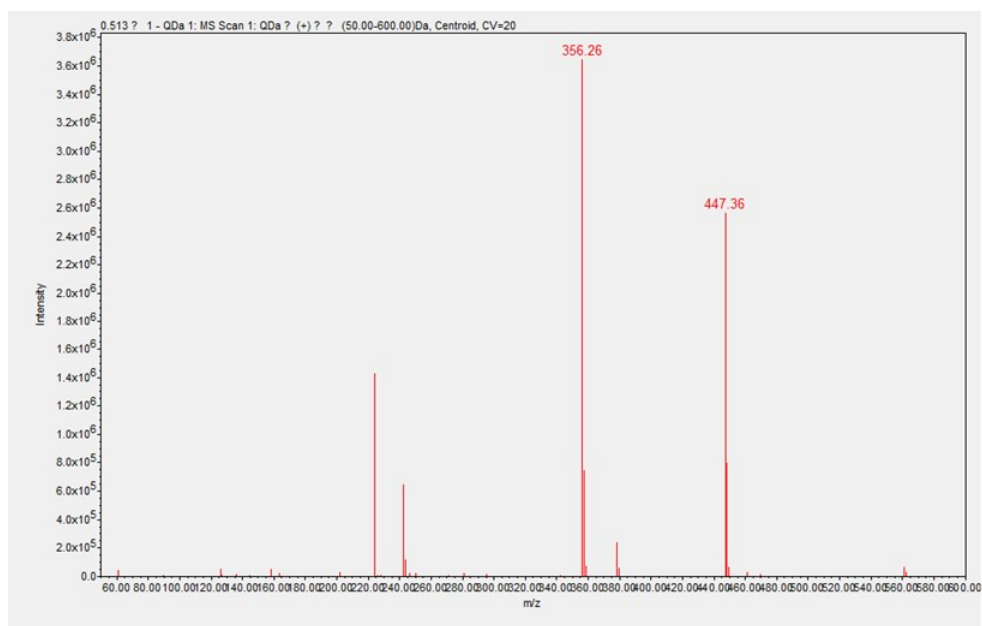

**Fig. S3** The mass spectrometry of **HHTB**.

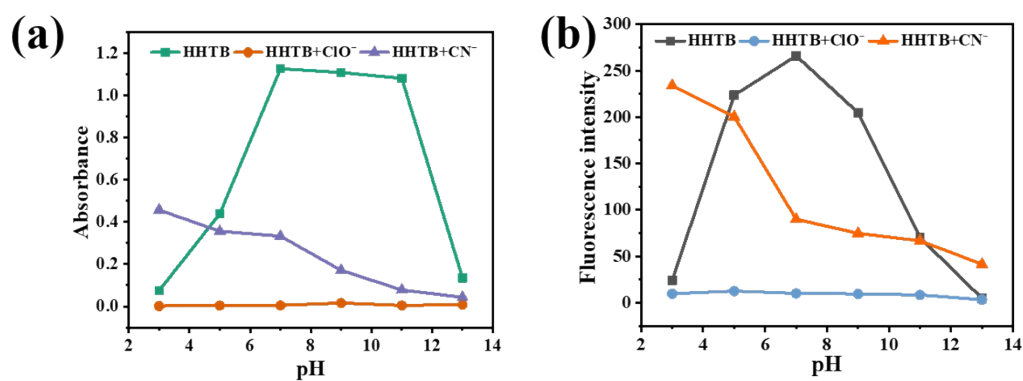

**Fig. S4** (a) Absorbance of **HHTB** (10  $\mu\text{M}$ ), **HHTB-ClO<sup>-</sup>** (20  $\mu\text{M}$ ) and **HHTB-CN<sup>-</sup>** at different pH. (b) Fluorescence intensity of **HHTB** (10  $\mu\text{M}$ ), **HHTB-ClO<sup>-</sup>** (20  $\mu\text{M}$ ) and **HHTB-CN<sup>-</sup>** at different pH.

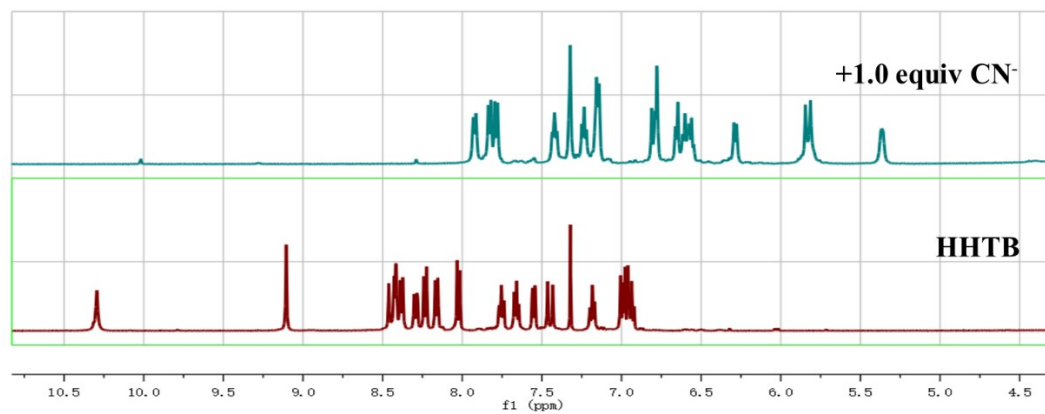

Fig. S5 <sup>1</sup>H NMR Titration of HHTB with CN<sup>-</sup>

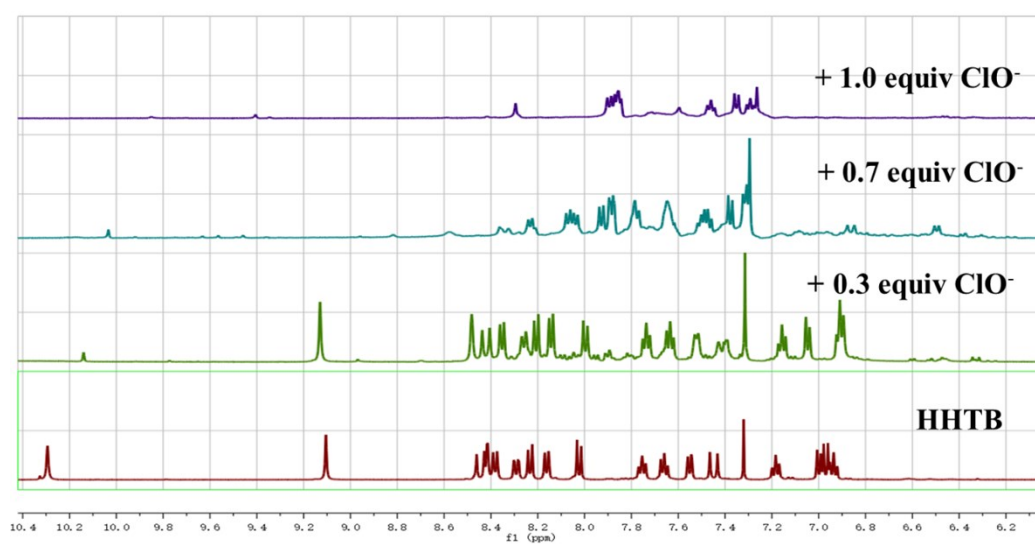

Fig. S6 <sup>1</sup>H NMR Titration of HHTB with ClO<sup>-</sup>
